# Supplementary material for: Potential of a Novel Chemical Compound Targeting Matrix Metalloprotease-13 for Early Osteoarthritis: An In Vitro Study
Source: MDPI journal article supplement (doi:10.3390/ijms23052681), 2022-02-28
Supplement: s1 [file s1]

## Supplementary Figure S1

Figure S1

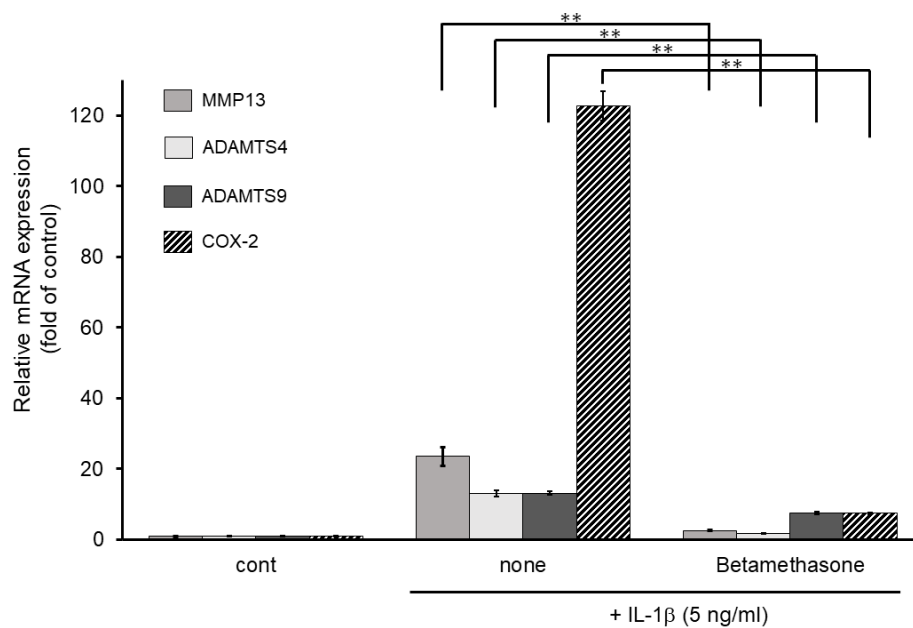

**Figure S1. Inhibitory effect of betamethasone (100  $\mu$ g/mL) on the expressions of various genes induced by IL-1 $\beta$  in OUMS-27 cells.** MMP13, ADAMTS4, ADAMTS9, and COX2 were induced by IL-1 $\beta$  stimulation, and betamethasone attenuated these inductions. \*\*  $p < 0.01$ .

Supplementary Figure S2

Figure S2

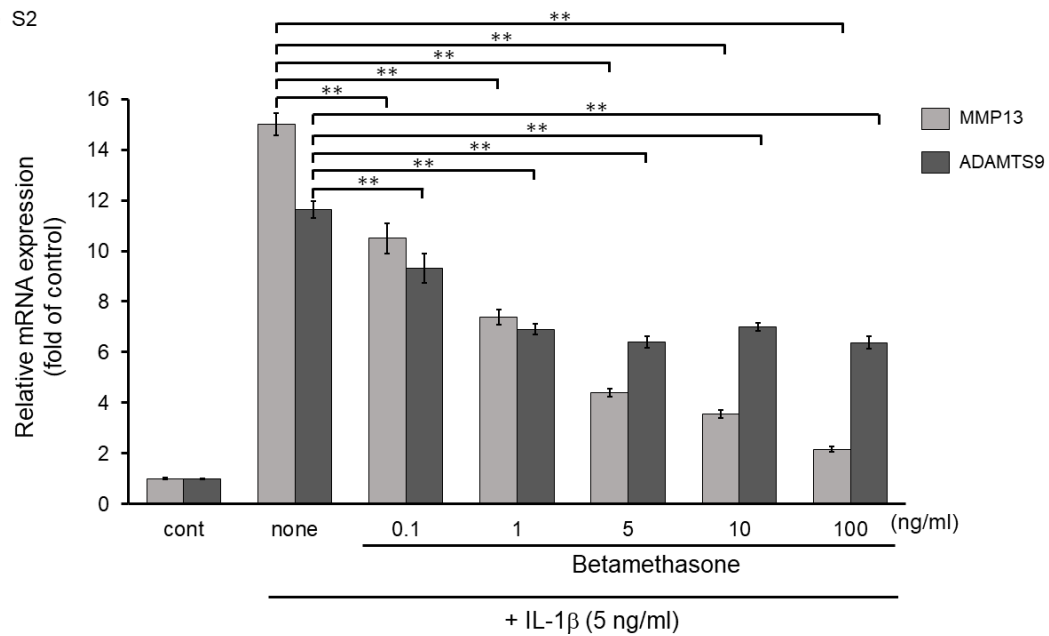

**Figure S2. Dose-dependent inhibitory effect of betamethasone on the relative expression of MMP13 and ADAMTS9 mRNA in IL-1 $\beta$ -stimulated OUMS-27 cells.** Cells were treated with 0.1, 1, 5, 10, and 100 ng/mL of betamethasone. Betamethasone exhibited inhibitory effect in a dose-dependent manner. \*\*  $p < 0.01$

**Table S1.** The selected 11 compounds.

| Selected Compound | Name                                                                                                                                                                                                      |
|-------------------|-----------------------------------------------------------------------------------------------------------------------------------------------------------------------------------------------------------|
| 1-B5              | Berberine chloride                                                                                                                                                                                        |
| 1-G5              | [2-[(10R,13S,17R)-11,17-dihydroxy-10,13-dimethyl-3-oxo-7,8,9,11,12,14,15,16-octahydro-6H-cyclopenta[a]phenanthren-17-yl]-2-oxoethyl]propanoate                                                            |
| 1-H10             | 1-(2,3-dimethylphenyl)-6-hydroxy-5-(2,3,4,9-tetrahydro-1H-pyrido[3,4-b]indol-1-yl)pyrimidine-2,4-dione                                                                                                    |
| 2-G03             | N-[2-(5-methoxy-1H-indol-3-yl)ethyl]-4-methyl-2-(3,4,5-trimethoxyphenyl)-1,3-thiazole-5-carboxamide                                                                                                       |
| 3-B2              | 2-(8-methoxy-2-methyl-4-oxoquinolin-1-yl)-N-(3-methoxyphenyl)acetamide                                                                                                                                    |
| 3-C5              | (4Z)-4-[(1-methylindol-3-yl)methylidene]-2-phenyl-1,3-oxazol-5-one                                                                                                                                        |
| 4-B2              | 3-(1,3-benzothiazol-2-yl)-7-hydroxy-8-methyl-4-oxochromene-2-carboxylic acid                                                                                                                              |
| 4-C4              | 3-ethyl-7-[2-(4-methoxyphenyl)-2-oxoethoxy]-4-methylchromen-2-one                                                                                                                                         |
| 5-A6              | 4-[[[4-[2-[(10R,13S,17R)-11,17-dihydroxy-10,13-dimethyl-3-oxo-2,6,7,8,9,11,12,14,15,16-decahydro-1H-cyclopenta[a]phenanthren-17-yl]-2-oxoethoxy]-4-oxobutanoyl]amino]methyl]cyclohexane-1-carboxylic acid |
| 5-B2              | (2Z)-7-[[bis(2-methoxyethyl)azaniumyl]methyl]-3-oxo-2-[(3,4,5-trimethoxyphenyl)methylidene]-1-benzofuran-6-olate                                                                                          |
| 5H11              | 2-[2-[carboxymethyl-[(2-hydroxyphenyl)methyl]amino]ethyl-[(2-hydroxyphenyl)methyl]amino]acetic acid;hydrochloride                                                                                         |
